# Supplementary material for: A SNP variation in an expansin ( EgExp4 ) gene affects height in oil palm
Source: PeerJ journal article supplement (doi:10.7717/peerj.13046), 2022-03-16
Supplement: Fig._S1.pdf [file Fig._S1.pdf]

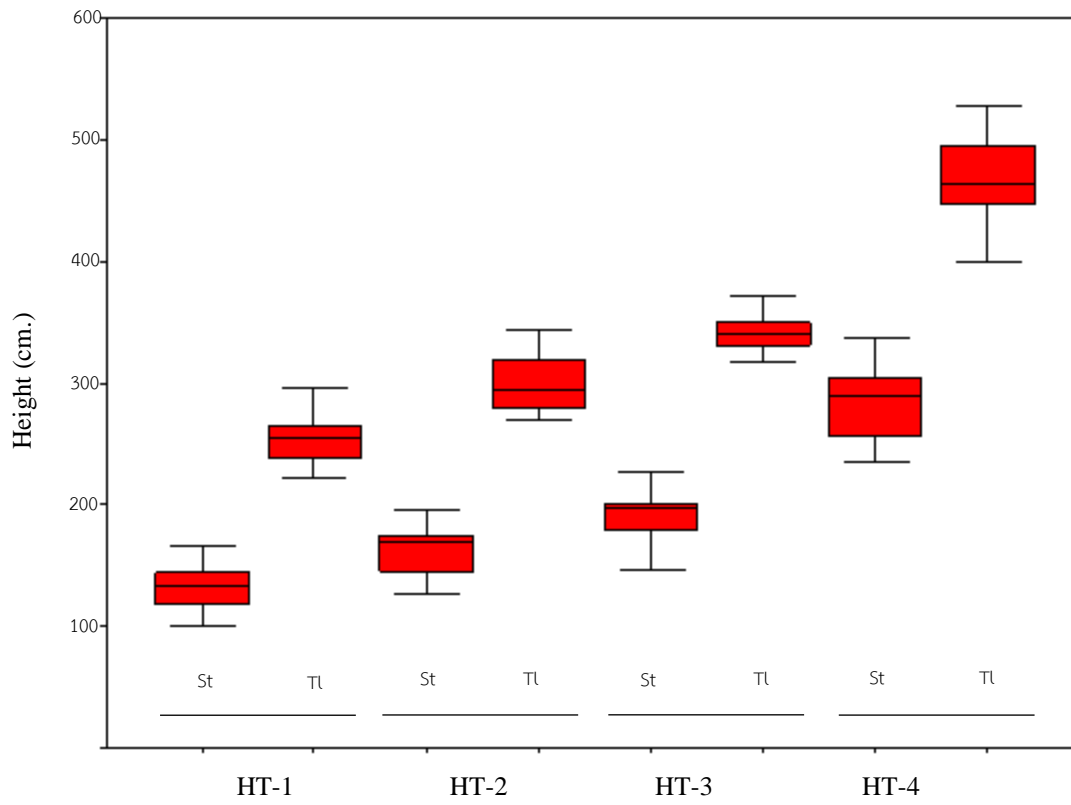

**Fig. S1** Comparison of height distribution in short (St) and tall (Tt) oil palm groups from height data, including HT-1, HT-2, HT-3 and HT-4, of the GT population. cm = centimeters
