# Supplementary material for: A SNP variation in an expansin ( EgExp4 ) gene affects height in oil palm
Source: PeerJ journal article supplement (doi:10.7717/peerj.13046), 2022-03-16
Supplement: Fig._S2_edited.pdf [file Fig._S2_edited.pdf]

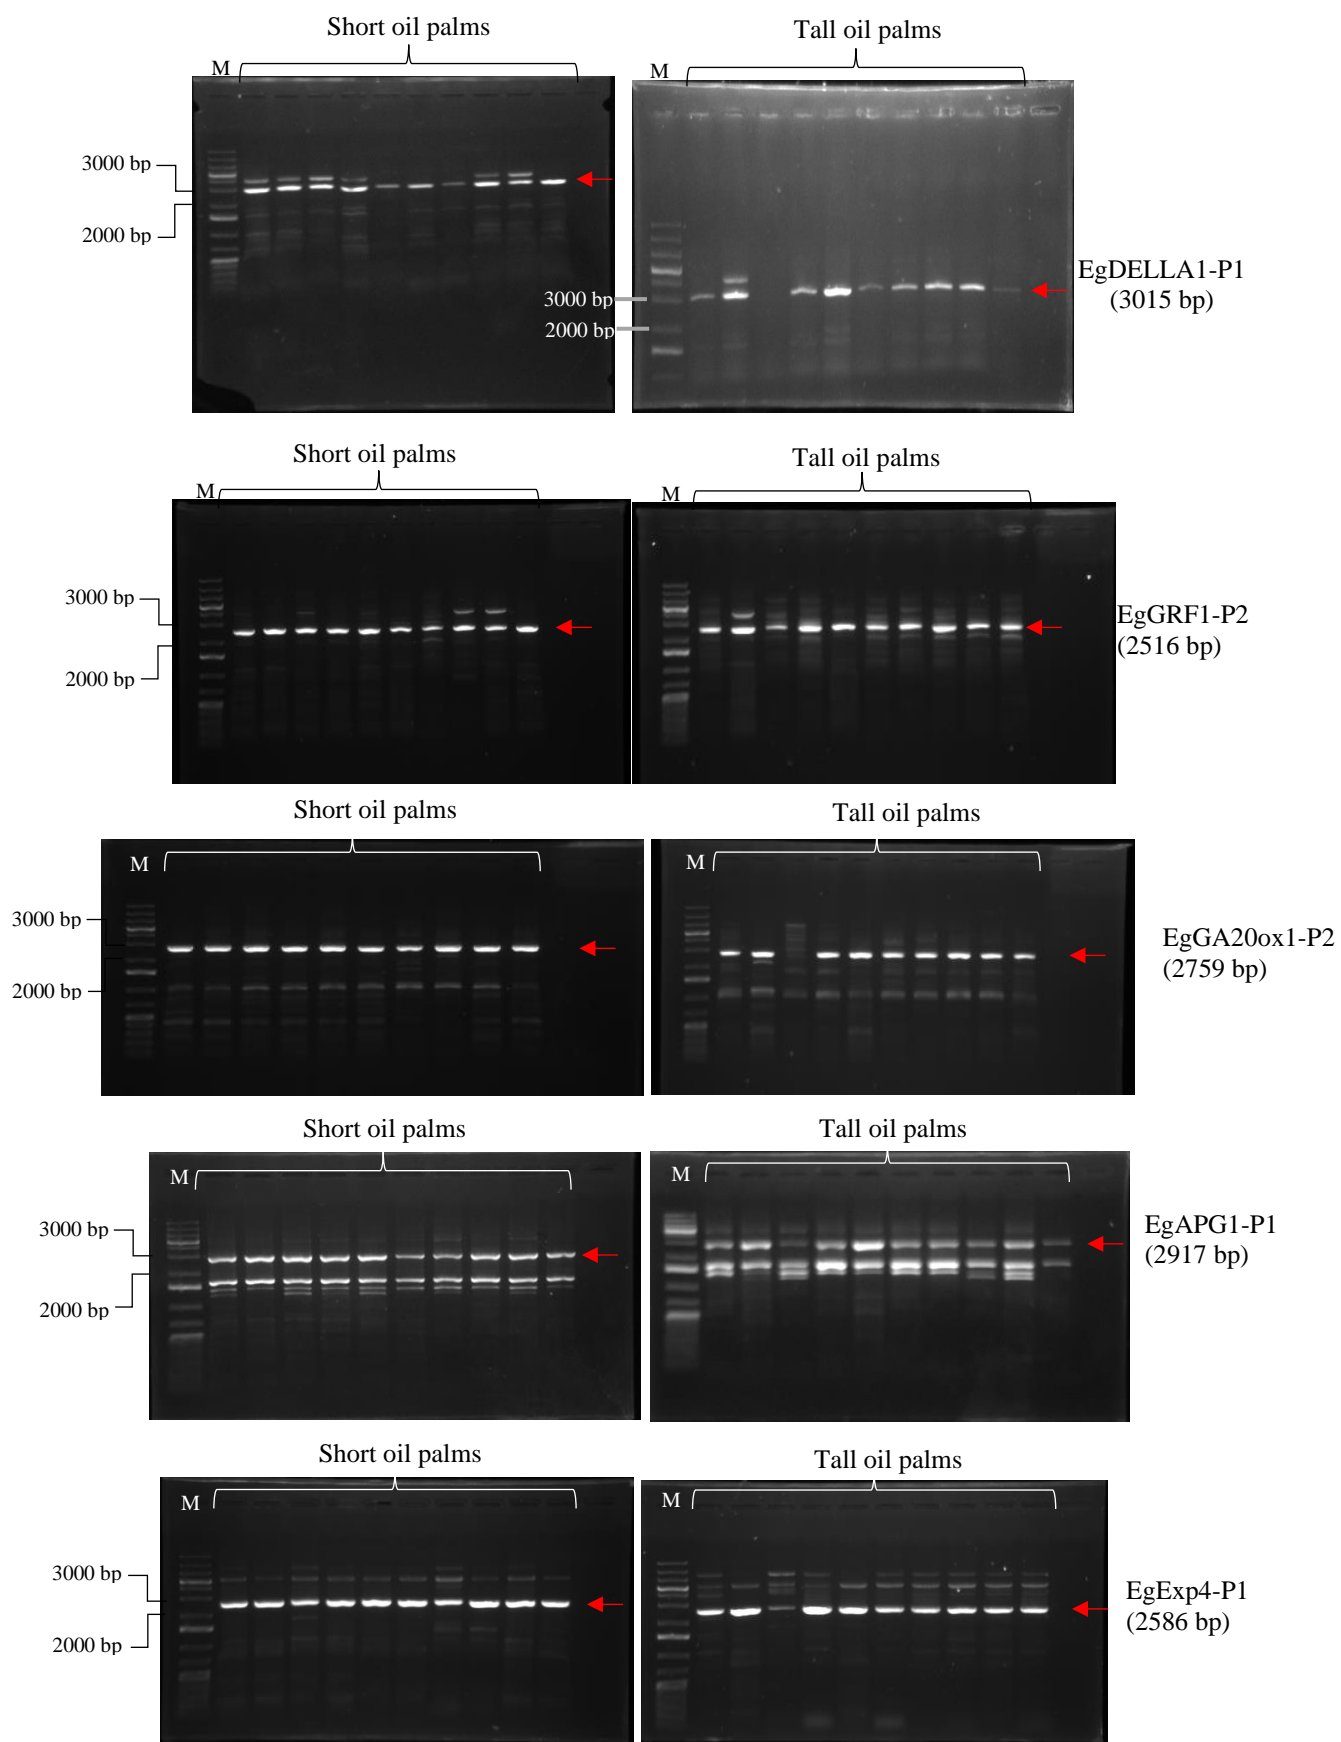

**Fig. S2** Example of PCR products amplified from the height-related genes by the gene-specific primers, including EgDELLA1-P1, EgGRF1-P2, EgGA20ox1-P2, EgAPG1-P1 and EgExp4-P1 with bands close to the expected sizes from 2516-3015 bp (shown by red arrows). M = 1Kb Plus DNA ladder
