# Supplementary material for: A SNP variation in an expansin ( EgExp4 ) gene affects height in oil palm
Source: PeerJ journal article supplement (doi:10.7717/peerj.13046), 2022-03-16
Supplement: Fig._S4.pdf [file Fig._S4.pdf]

### ***EgDELLA1* Full length information**

Length: 3015 bp (Same as report)  
START Codon: 923-925 (Checked)  
STOP Codon: 2659-2661(Checked)  
SNP T → A: 2100  
SNP G → A: 2248

#### BLAST Information

Name: DELLA protein RGL1-like [*Elaeis guineensis*]  
Sequence ID: XP\_010938288.1  
Exon 1: 923-1375  
Exon 2: 1495-2792

 = Primer  
 = START/STOP codon  
 = Insertion T → TA. Insertion found in some short oil palm  
 = Nucleotide change (SNP) T → A. Base A found in some short oil plant  
 = Nucleotide change (SNP) G → A. Base A found in some short oil plant  
Underline = Exon

### *EgDELLA1* Full Sequence

```
1      TTTTCGtACA TTCGGCTCTG TGCAATGCAT GAATCTTTGA TTAATTTTCT
51     TATAATTCCT TACACATGTG ATTGGGCTCT CCAAGATTCT TGGTTGCTTC
101    CTGTCTTATT GTCAGCTTTT GAAAGCAACT TCTTGCTATG GTCTATAGCA
151    ATGGGTAGGT CTTTAATGAA ATAGAGAGAA ACTGGTCCGG AATTTGGAAT
201    TTGTGGGTAC CAGTTCTTTG CTTGTCAATT GTCCTATTA CATATCTTGG
251    AAGAATTTTC GGTCCAGACA AATAGCCGGT GCCATTTGAT ACCTTGTTGC
301    AATGAAACCA TtAAAAgACT GCATTCTTAA TTAAATATAA TGAAGTTTCT
351    AATCTGAAaG ATTTTATTAT TGAGGTTTCT TGATATGTGG GCCCTCTGCA
401    ACTAACTCGT TGTTGGGTCA TCGTGCACAC CGTAATTGGT AACACCGTCC
451    AATCTgCTCA CACCTTCTGC TTCGATTTGT ATTTGGTTTA ATACAATTTG
501    GTCCTCTCAC TCCATGATTA GTTGCCATGG AGCCAGCTAC TCACCAACTG
551    TTTGCATccA GAACCACATA AATGAAATGA CcGcAAAGTA TAAAAATTGA
601    CGCCGCTATT GATCAATGAT TAATACTATG TGACTTGTTT TTAGCTAGCG
651    AAAGCCAaTG GAAAACACTT AAAACAAttt gCTAATACCA TGGCTTGGTA
701    GGACTGTCTT ATGCTAACAA TGTTGTCATG GATTACTTCA GCTTTCCTGT
```

[cont. *EgDELLA1* Full Sequence]

751 CATTTCCCCT TGTTGGATTC CCTTCACTTT GTGGATTTCT AGCACCAAAG  
801 TTTCCAACAT TTTGGATCAC TCAGAACTCT TCAACTCATA AACATTTATC  
851 ATAGCCCATC AAAATCTGGA ATTGTCAAAT CTTGAGAAGA AGTTTAGCAC  
901 TACACAGAGG TCTGCTGCGA AGATCCTGAG CTCTCCCTTC TCTTTtCCGT  
951 GTTTCGATTG TGATGGTACA CAGCAAGGCT ACACCCCTCT GCAGGGATTT  
1001 GAAGAAGAAG AGTGCATTGA TGACCTTTGG TCTGGTTACA ATTCATACCA  
1051 TGATGGCCCT TTTGAGAAGG TAACCCCTT GCTATCCAGT GAACAGCAAT  
1101 GCTTCCAAGA TCTTGCAGTG ATGGATGACA TGCAGCTTGA TACAATTTCT  
1151 GCAGCAATCC AGTCCTTGA CAAACCTTTG GCCCAGGAGA CACAGATACA  
1201 GCAGCAGCCA GTGGTGCCTG AAATCCCTGA GCTTCTTGA TCAGAGGAGA  
1251 AGGCATCCCC AGTGAACTTC TCATCATTAG AGCTTCTGAA CAACTACAGA  
1301 TCAAGCTACA GTCGCCTGAA CGGAGAAAAG CTGAATGAAC CGATTGACGG  
1351 GGTCACGCAG CCAGTGGAAG GAGGCAAtGA GTTGTGACG GAGGAAATCA  
1401 TGAGAATTGC TGCTGTCCAT TTTGTTTCAAG TGTC AACCCA TAAAGAAAGT  
1451 GATCCTTTTCG TGCCTTGGCA TCCTGCTAAC TTCTTATTTT AGGCCTCACA  
1501 AATGAGGAAA GAGAGAACAT CGGCCTCGCA AACCTTCTtC TGGCTGCTGC  
1551 GGAGAAGATA AGCAACCAGC AATATGATCG AGCTAGCAAT TTA CTTCAGG  
1601 AGTGTCACAA ACGGTCATCC AAAACCGGAA ATCCAGTTCA GAGAGCTGTT  
1651 TTCTACTACA CAGATGCATT ACAAGAAAGG ATCGATAGAG AAATTGGAGG  
1701 GCTTTCATCG AAGGTTCCAA AGGATGGGGG CATGACGGCA CCAGAGCTCA  
1751 TCAAAGCATT GTTATCTGAC CACCCATTGC ATGTGGCACT CTACAATAAG  
1801 CTGCCATTCT CACAAATCGA TCAATTCACT TCGGTGCAGA CCATGTTGGA  
1851 CAACATGGCC ACCGCAaGGA AAATCCATCT GATCGATCTC TCGATCCAGC  
1901 ATGGGATCCA GTGGGCTGTT TtCTTGCAAG CACTGGCCAC AAGAACAACA  
1951 TGTCCAATCG ACCGTCTGAA GATTAGTGCA ATAGATACAT CAGAAGAGGC

[cont. *EgDELLA1* Full Sequence]

2001 AATCACTGCA ACTGGTAACA GGCTGGTAAG CTTTGCGGAA ACTTTAGGCT  
2051 TGCCCTTAAG TTTTAAAGCA GTGGCAGTCT CAGATCTCAA GGATCTCAAT  
2101 GAAGAGATGT TTGAATTGGA GGAGGGCGAA GTGATCGGTG TCCGCTCTTC  
2151 GATGTTTATG AGCAGCTTGA TTGTCAGGCC TGACATACTT GAGCATGTCA  
2201 TGAGAGTAAT GCGCAAGATT AAGCCATACG TAATGATAGT TGCAGAT  
2251 GAAGCTAAAC TTAATTCCCC ATCTTTCATC AACCGCTTCA CTGAAGCCTT  
2301 GTTTTTCCAC AGCGCCTTAT TTGACTTCCT GGAAGGCTTT CTGAAGAGGG  
2351 ATGATGAAAG TAGAATGCTT GCAGAGGGAT CCTTCATTTT ACAGGGAATA  
2401 CGAAACATCA TAGCGACCGA GGGCCATGAG AGGCTGGCCA GGTATGTAGG  
2451 CATCAGCGTG TGGAGGTCAT TCTTTGCTCG TTACGGCTTC ATCGAGACTG  
2501 AGATGAATGA GTGGTCACGT TACCAAGCTA GACTGCTAGT TAAGCAGTTT  
2551 GCTAATGGCC ACTTCTGCAC ACTTGACAAG AATGGGAAGG CCTGGACCAT  
2601 GGGGTGAAG GGGACCCCCT TGCTTTTTTAT CTCTGCTTGG AAGTTTCAGC  
2651 AGGCAGGATA GGAAGAATTT TTCTAGTTCT CAATCTGATA TTTATATCAT  
2701 AGCACTAGGT TTTATTATGC CATATAGGAG CAGAAAGCAA GTATGAGGTG  
2751 TTGGTCCTGA AATGTTGCCA AAAAGTTTAT AACTTGCTCT TAGAATTCTT  
2801 GTAGTCCTTT TTATGCCATG TAACCTCTGG AAGCTGAAGT ATTGAGTATA  
2851 TACTAGCATG TCACGTTCCC TCCTCTTGGT GGATCTTCGA GTCTTGTGCT  
2901 CAGGTCTCAC ATTATGCAGT TATGTATGAT ACACAGCATG AATTTTTTTC  
2951 CTGAAAGTAA ATAACCAATA TTATTCCTAT AAGCTAACTC GCATC  
3001 GCTTTCGAAC AGGAT

///End of sequence

**Fig. S4** The insertion and SNP variations are illustrated on the *EgDELLA1* reference gene sequence, which has a full-length of 3015 bp (oil palm draft sequences of Malaysian Palm Oil Board (MPOB), (<http://genomsawit.mpob.gov.my/genomsawit/>)).
