# Supplementary material for: A SNP variation in an expansin ( EgExp4 ) gene affects height in oil palm
Source: PeerJ journal article supplement (doi:10.7717/peerj.13046), 2022-03-16
Supplement: Fig._S5.pdf [file Fig._S5.pdf]

### ***EgGRF1* Full length information**

Length: 2516 bp (Same as report)  
START Codon: 772-774 (Checked; Different with report)  
STOP Codon: 2112-2114 (Predicted)  
Deletion TATA → T : 1044  
Insertion G → GT : 1100  
Insertion A → ATCTC : 1553  
Deletion ATCTCTC → A : 1553

#### BLAST Information

Name: growth-regulating factor 1 [*Elaeis guineensis*]  
Sequence ID: XP\_010932423.2  
Exon 1: 602-973  
Exon 2: 1146-1544  
Exon 3: 1657-2091  
Exon 4: 2196-2504 [outside this sequence]

 = Primer  
 = START/STOP codon  
 = Deletion TATA → T. Deletion found in some short oil palm  
 = Insertion G → GT. Insertion found in some short oil palm  
 = Insertion A → ATCTC. Insertion found in some short oil palm  
 = Deletion ATCTCTC → A. Deletion found in some tall oil palm  
Underline = Exon

```
1      TCATTGTTCC ACACTTCCAC ATCTTTACCA TTACTTTGTG TTTTtGTTTA
51     AACCCCAAAC AACTCTTTtG TTTATGAGTT TCCGTAAAGC TGGCAGGAGA
101    CAACAGCAGC AAAAGGCACC AGAGCACAGC AGCTTGCTGC AGAGATAGGA
151    AGAGATAGAG AGAGAAATAT AGAGCTAAAG ATAGAGAGAG AGAGCGAGAG
201    CCCTGCTCTC CTCTGGTTGG CAGACCTGCT CCTGCCCCTC CTGCTGCTGC
251    TCCTGCTCTC AGCCATAATA ATAAGAGCAG AGTCTACTGC TCCCAGGTGG
301    CAGAACCACC TGCAACCATT CTGACAGCCA TTAGCATTAA ACTGGTGGCT
351    TTTACCCGAG TGACATGGAA AGGCATGCAC CATATATCAT CACTCCACCA
401    CCCAACCCCTT TTGCTTGCCC TTTTCTTTt CTTTTGTTAT ATATTCTATA
451    AGCCTCAGGA GTCTTGATTG ATCCATGCAA CTACACAGAA GATTCTGCAG
501    CCTACACTCT GCCTCTTGAC TGAATGACCC ATCCTATGCA CCCACATCAT
551    AAAaTAATCC CCATCCTAAT ATTATTGTTT ATTATAATTT CTGAAACTCC
```

[cont. *EgGRF1* Full Length Sequence]

601 TCAGCGTTAA ATGCAGGCAG CCCCCcTTT CCTCTCTCCT ATTTGTAGCA  
651 TCTAACTCCA TACAAATATA TCAATATATG TAAGCAGGTG TAGCTTGTCT  
701 CCTCTCTCAT TTCCTCTCTG TTTTCACCTC TTCTCCTCTT GAAGTTGATA  
751 GGTTTGTCTTCT TTGGCTTTGA GATGATGATG AGTGGGAGGA ACACCTCTAG  
801 GTATCCCTTC ACACCCTCTC AGTGGCAGGA GCTGGAGCAC CAGGCTCTCA  
851 TCTTCAAGTA TATGGCCTCA GGAATCCCCA TCCCCTCTGA TCTCATCCTC  
901 CCCATAAGGA GGAGTTTCCT GCTGGATTCC ACCATCCCCT CCCcAACTTT  
951 GGCCTTCCCT CCCCAGCCTT CAAGTAAGTT TCTTCTCTCT CTTtCTCTCT  
1001 CTCTCTCTCT ATATATATAT atgTGTGTGT GTGTGTaTAT ATATATAaTA  
1051 GATAGATAGA TAGATAGATA GATATTTGAA TTTACTTCTC TTCCATGtGG  
1101 TTTTTtGAGa GGAAAAatGT TTTGATCTGG GTCTCTGTAT GGCAGTGAGC  
1151 TGGGGCTGGA ACCAGAtGGG TTTTGGCAGG AAGGCAGAGG ATCCAGAGCC  
1201 AGGGAGGTGC AGGAGAACTG ATGGGAAGAA GTGGAGGTGT TCCAAAGAGG  
1251 CCTACCCAGA CTCCAAATAC TGTGAGAGGC ACATGCACAG AGGCAAGAAC  
1301 CGTTCAAGAA AGCCTGTGGA AATGTCTTTG GCCACCAGCC TCCCCTCTTC  
1351 CACCTcTTCT TCCACCCCTT CCACCTCCCA CACCCCCTCC CTCCACCCAC  
1401 CTCCTCTCTC CATCTCCACT CCAGACTCTC ACCAGCTTCT GTATCCCTCC  
1451 CACCCCCTCTT CTAGGATACC TGGTGTGGC CTCAACACTC CCCACTTCAA  
1501 TCTACATGCT CCATCCTACA CCCAAGCTGA CAAGAACTAC AGGTTTGGAT  
1551 TCATCTCTCT CTCTCTCTCT CTCTCTCTCT CTCTCTCTCT CTCTATCTAT  
1601 CTATCTATCT ATCTATCTAT CTATAACTAG TGGTATGAAT GACTGGAATG  
1651 GCAGGTATTG TCATGGAATG AAGGATGTGG ATGAGTACTG CTTCTTTTCA  
1701 GAGGCCTCAG GAAGTGAGAA GGAGAGCTCA TGGCAGTTCA GGCCACTAGG  
1751 GATGAGTTCA CTAGGAGATA CCAAACAGGG GAGTTCTGCT CTGCAGCAGA  
1801 GCACCTACTC TCACTGTGGA AGGGATGCAG AGGAGAAGCA GCAGCACTGC

[cont. *EgGRF1* Full Length Sequence]

1851 TTTGTCTGG GGGCTGATTT CAAGCTGGAG AGGCCTGTGA AGGTGGAGAG  
1901 GGAGCAGGAG GAGGGCCAGA GGCCTCTGCG CCACTTCTTC GATGAGTGGC  
1951 CgCAGAGGAG CAGAGACTCA TGGGTGGATT TGGAACAGGA GAACTCCAAC  
2001 CAGGCATCTA CCTACTCCAA GACCCAACTC TCAATCTCCA TCCCCATGTC  
2051 TCATCACGAC TTCCCGGTCA CCGGTCCCG ATATCGCAAT GGTGTAGTCC  
2101 CCACTGCCCA **ATGA**TCCTTC CATCCCAATA TATTGTCTTC TCCATTGTTG  
2151 TATTAATCCT TTTATCACCC ATCTTTCAAT TTAATTGTGT TGCAGATGAC  
2201 TGAGTTCTGA AAGGCTTTCT GTGCGAGCTG GGACCAAAGA ACTCATCAA  
2251 GCTCCATGGT ATCTTGTCAG ACAGAAGCTG TTTTCCAATG GGCTTCAATG  
2301 CCCTCCTTGT GTATTACCCA TTGTTTGTTT TTTTCTTTG TTAGTGTGT  
2351 CAGGAAGAAC TTTACATTC CTCATTTTGT TtCCTCTGGC TTTGTCTGTT  
2401 CCAATGGCTG AGGAGAAGTC TTTAGGAATG AGGAGATCGT TTCGTCTATA  
2451 ATtGTCTATC ATGTCATCAT CTATTATCTC TATCATCTAT **CTGTAACCAG**  
2501 **TCTTCTGATC TTCTCC**

///End of sequence

**Fig. S5** The insertion and deletion variations are illustrated on the *EgGRF1* reference gene sequence, which has a full-length of 2516 bp (oil palm draft sequences of Malaysian Palm Oil Board (MPOB), (<http://genomsawit.mpob.gov.my/genomsawit/>)).
