# Supplementary material for: A SNP variation in an expansin ( EgExp4 ) gene affects height in oil palm
Source: PeerJ journal article supplement (doi:10.7717/peerj.13046), 2022-03-16
Supplement: Fig._S6.pdf [file Fig._S6.pdf]

## ***EgGA20ox1* Full length Information**

Length: 2759 bp (Same as report)

START Codon: 886-888 (ATG GCC ACC) (Checked)

STOP Codon: 2221-2223 (TGA TGA CAC) (Checked; Different from report)

G → GAA insertion : 1428

G → GA, GAAA insertion : 1428

T → G SNP : 1468

### BLAST Information

Name: gibberellin 20 oxidase 1-D-like [*Elaeis guineensis*]

Sequence ID: XP\_010934079.1

Exon 1: 697-1394

Exon 2: 1517-1839

Exon 3: 1946-2474

### Legend

  = Primer

  = START/STOP codon

  = G → GAA insertion. Insertion found in some short oil palm

  = G → GA, GAAA insertion. Insertion found in some tall oil palm

  = T → G SNP. Base G found in some short oil palm

```
1      TGTTgGCTTG AGCATaGGAC TCATATCTAT TTCTGCCAAT CAAAGATTGA
51     TATAAATATA GATAGATAAA TAAATGACTA TATTAATATG ATATTAACTA
101    TTTgTTGTAA TTTGCTTTcC TTTTATTgGC AAGATaCGGC CGCAAGaAtA
151    gGTTTACTTT TTGGTTGCCA ATAGCAAACCT CCTGTATTCA GAAGAAATTA
201    TTAGATGGAT TAGGTTTAGT TGGCCAATTC AAATCCCAGA GCACATGCAC
251    GTTTTTACTA TACATGTGCC CTAAAATTTA GATTGGTCCA TTGGATCTAG
301    TCTATCTAAC AATCTGGCTA CATTGAACCC tCACCTCAA GAATGGAGAA
351    ACTACTAAAC GGACCACATC GGATCAGTCC AAATCCCGAA ACACGCGTAC
401    AGTGCATGAT AGCATGAATT CTCTCCTCTG TTTTGATGTT GAATTATTTA
451    AATAAAATGG GGTAACGTGG AAAGTGACAA TTGGATGGAC TTATTGGACG
501    TGATCCATCT ACTAACTTGA ACCTTACATA TACTCATTGT CATACTCCTG
551    AAGTATTAAA ATGATATCAT TTATaAAAAA ATATTCACGA TGGTTCTGAT
601    TTGCTGCACC CAGAATTACC CACTGTGGAG TCAAACCACA AGCCTTGTTG
```

[cont. *EgGA20ox1* Full Length Sequence]

651 CTCCCACTAT AAAATGGGCA GCAGCCAGGC CAAATGATAC GAAGAGATTG  
701 AATCCTTTAA GATTCCATAT TTTTCTATAC CGGCTTCTCT CCTCCCACTC  
751 CCACTCCCAC TCCCActcCT CCCATTCTGC AACCCCATCC CTTCTTTCCT  
801 TCCTCTCctc TTTCTCCATC CACCCCTGGT ACTCCGCTCT CTCGcCCCAC  
851 CGGAGGCCGA ACAGGAGGCg CGGGCCCCGC AGCCATCGC CACCGCCGCC  
901 CAGCAACCGC CGTCGCTGGt CTTTGACGCC GCCGtCCTCA GCCAGCGGCC  
951 GGACATTCCG GTCGAGTTCG TCTGGCCGGA GGAGGACAAG CCCACCCCGG  
1001 ACGCCGCCGA GGAGCTGTCC GTCCCCCTGA TCGACCTCGG CGACTTCCTC  
1051 TCCGGCGACC CCGCCGCCGT GGCCGACGTT TCCCGACTCG TCGGCGAGGC  
1101 GTGCAGTCGG CACGGCTTCT TCCACGTCGT CAACCACGGC ATCCCCTCGG  
1151 CGCTCTTCGC CAAGGcCCAC CGCTGCGTCG ATGGCTTCTT CTCGATGCCG  
1201 CTCGCCGAGA AGCAGAGGGC CCAGCGAAAG CCCGGGGAGA GCTGCGGCTA  
1251 CGCTAGCAGC TTTACCGGGA GATTCGTAA TCGGCTCCA TGAAGGAGA  
1301 CCCTTTCTTT TCGCTTCTCC TCCTCTCCTC TCTCCCCAAA TATCGTGCAG  
1351 GACTACTTCG TCCGCACTCT TGGCGAAGAT TTCCTGCACT TTGGGTAGGA  
1401 CAGAATAACA AAACaAGACT GCGACATGaa aaaAAAAAA ACTaCTAATA  
1451 ATaGaaaAAA AAAcaAtTGt ttTTTTTTTTT cCtTATAAAT TTCCTTCAT  
1501 TACTGTGGTT CTACAGCCAG GTGTACCAAG ACTACTGCAA TCGGATGAGC  
1551 AAGCTGTCAT TGGCGATAAT GGAGATTATC GGGACGAGTC TGGGGGTGGG  
1601 GCGGGCATAT TATCGGGAGT TCTTCGAAGG GAATGATTCG ATAATGAGGC  
1651 TGAACTACTA CCCACCGTGC CAGAAGCCGG ACCTGGCCCT CGGCACCGGT  
1701 CCCCATTGCG ACCCCACCTC CCTGACCATC CTCCACCAGG ACGACGTCGG  
1751 CGGCCTTCAG GTGTTCACCG ACGGCAAGTG GCGCACTGTC AGCCCCAAAC  
1801 CGGATGCCCT TGTTGTCAAC ATCGGTGACA CCTTCATGGT ACACAATATC  
1851 TATACAATCA ACTCTTGAC TTGGAATTAA TATTTGAGA TCTTCGATCG

[cont. *EgGA20ox1* Full Length Sequence]

1901 TATTATGAGA AGGGATGGTC TTCGTTGTAA TATTGGATTT GCAGGCGTTG  
1951 TCGAATGGGA GGTACAAGAG CTGTCTGCAC CGGGCGGTGG TGAACAGCAA  
2001 GGTGGCGAGG AAGTCTTTTG CCTTCTTTCT GAGCCCGGAG ATGAACAAAA  
2051 TAGTGC GGCC GCCGGTGGGG CTGGTGGACG CGGAGCACCC GAGGGCCTAC  
2101 CCGGA CTCA CGTGGTCGGC GCTGCTCGAG TTCACCCAGA AGCACTACCG  
2151 GGCCGATATG AACACCCTCG ACGCCTTCAC CAAGTGGATG ATGCTCCAGG  
2201 CCGAGGGGCC CGTGCCGCAG TGA TGACACG GCTGGGGGAT TTTTCTATCA  
2251 ATTTTTTAAG TCATTAAACC TCTTGGATTT AACTAGCTAG CTAGCTTATA  
2301 GGGGGTCGGA TACAGAGGAA GGTTATGGTG TGAAGGAATA ATGAGGCTAG  
2351 GGAATGAAAT AAAAGTAAAA GGAGGaa gTG AAACGTACGC TTGTTTCCAA  
2401 CTCTCATCGG AGCCAGCCAC TGTTAATACC ACTGTGAAGT AAATTGCCCG  
2451 TAAAGGCCAG CACATCTCTT GTCATTACAC TCTTTCTCTC TCTTTTTTCAT  
2501 CCTTTATTTT ATATTTGAAC AAAACTTATA ACACGGGGAG AACAGGGGT  
2551 GGGAGAATCC ACGCCTTTAG GCTATGATAG GAGGGGCAGG CAAAAGAACA  
2601 AGCTTCGGTG GCACATGTTT TTAGGAGAAC AGGAGATGGT GATGATGACG  
2651 GAGGGACGAC GACATACCAA AGAGGCGGAC GGCTCGATAT CTCCGCAGCA  
2701 CTGGCTTGTC CTCTCCTGCG ACTGGATTTT TTCTATTTCT CTTTTGTCAC  
2751 CTAGCGCCT

\\end of sequence

**Fig. S6** The insertion and deletion variations are illustrated on the *EgGA20ox1* reference gene sequence, which has a full-length of 2759 bp (oil palm draft sequences of Malaysian Palm Oil Board (MPOB), (<http://genomsawit.mpob.gov.my/genomsawit/>)).
