# Supplementary material for: A SNP variation in an expansin ( EgExp4 ) gene affects height in oil palm
Source: PeerJ journal article supplement (doi:10.7717/peerj.13046), 2022-03-16
Supplement: Fig._S7.pdf [file Fig._S7.pdf]

### ***EgExp4* Full length Information**

Length: 2586 bp (Same as report)  
START Codon: 1045-1047 (Checked)  
STOP Codon: 2006-2008 (Checked)  
T → C SNP: 118  
TC → T deletion: 989

#### BLAST Information

Name: expansin-A2 [*Elaeis guineensis*]  
Sequence ID: XP\_010938009.1  
Exon1: 1005-1119  
Exon2: 1304-1616  
Exon3: 1706-2386

#### Legend

  = Primer  
  = START/STOP codon  
  = T → C SNP. Base C found in some tall oil palm  
  = TC → T deletion. Deletion found in some tall oil palm  
  = Exon

#### *EgExp4* Full Length Sequence

```
1      TGAGGGCTAC AATTTTGAAT GATTGGTATC CCTGTGTAGG TGAATATTCA
51     AACTAGAGG CAGTAATAAC AACATACGTA ATATGATAAT TCATGAAAGA
101    TACGATAAAA TTATTGGTGA ATAATTTGTT aAAATAAATC CTTACATCAT
151    TCAAATGATA TTAGGTGATT CAATTATCTA AGAGTAATCT AGAGCATCAT
201    CGAATCAACA CaAAAAAATA TGGCTAACTA GAGAATGCTT CAACAATTCT
251    GAGAACACAA TCATTGCTTA GATTGATAGG CTGATAGAAT ATATATCTTG
301    CTTGAAGGAA AAGATAAGAC CATTAAATTA AGTTTGAGAA CACGGATACT
351    AATCATTAGA TATAACCAAC TAACCTGCCT CATTCCTCAT TACCTAGCAT
401    TCTATGCAAA ATATTGCACT TAAGCCATTA TTTAGGATCT TTGAAAATAT
451    AACATATATA TATAGCTCAT TAATTGCAAT TTTACTTTTc CCCCCAAAAT
501    TAAACACAAT TGCATGCTTC TTCAATGTAA TCTTTACCAA CCATTTGGTA
551    CTTTCATAGT GCACTTAATT GTGCAGTTGT ATAAAGTTCC CTTGATAGCT
601    TAAGTTATAT TAATAATATT ATTATTTGGA ACATGGACAT ATCCACGCCT
651    CCTCTATATC CACATCTATA CTTGGATAGA ATAATTCATA TATATCAATA
```

[cont. *EgExp4* Full Length Sequence]

701 TCACATTTAT ATAGCGGTGC TCTCAGAGAA AAAGAAAGAA AGAAATaAAA  
751 ATATTTTCGT AGCGGTGGAA AATTGGACCG GGACACGGAG AGAAGATTCC  
801 TTGGGAGGAG GTGCATGTGC GTGAGGACCC CAATTGGGCT CAGCTGGTAC  
851 TTCACCCAGA ACATTTGCAT GTGCGCTTGA TTTCCATAAT CGCTGCAATC  
901 CGTTCCAAGC CTTTGCCCGG GGCCAGCGTG ACAACAACCT CCTTCGTCTC  
951 TTTATACTCC TCTCCCCTAT ATATAGCCCT CACCTCCC TC CCCCCCTTCG  
1001 CCAACCAAGC AACAAACACC TCCATTCCCT CGTACTCCTC TCCAATGGCG  
1051 TCCCCAAAGT TCTCGCTCTC GAACTCCGCC CTCTCCTTCT TCTTCTTTGC  
1101 TTCCTTGTGC TTCTTTGCAT CGCAAGCCTT GGGGGACTCC GGATGGCAGA  
1151 ACGCACACGC CACGTTCTAC GCGGTGGCG ATGCCTCCGG CACGATGGGT  
1201 GAGTCGATTT GTTCTCCGGG ATAACAAGAC TTGGCTCGCT GTTTAATTTA  
1251 GCTGCTTGCC AACTTCTCCT CATTGGTGCA AATTGGtTTT TTTTGGTTGC  
1301 AGGAGGGGCT TGTGGATATG GCAACCTCTA CAGCCAGGGG TACGGGACCA  
1351 ACACCGCGGC CCTCAGCACC GCTCTCTTCA ACAACGGGCT CAGCTGCGGC  
1401 TCGTGCTACG AGATGCGGTG CGCTGACGAC CCCAGTGGT GCCTCCAGG  
1451 CTCCATCATC GTCACCGCCA CCAATTACTG TCCCCGAAC TACGCCCTCC  
1501 CCAACGACAA CGGCGGGTGG TGCAACCCTc CCCGCGAGCA CTTCGACCTC  
1551 GCCGAGCCTG CCTTCCTCCA AATTGCCAG TACCGTGCCG GCATCGTCCC  
1601 CATCTCCTAC CGTAGGTGAG CATTGTCTAT ATAACCAATC TCTCAAGTCA  
1651 TATCTCAAAA GTGATCGACT TTATGAACTG TACTACGTGA TAAATATCTG  
1701 GTAGGGTCCC CTGTGTGAAG AAGGGA<sub>g</sub>GGG TAAGGTTAC CATCAATGGC  
1751 CACTCCTACT TCAACTTGGT TCTCATCACC AATGTCGCTG GGGCCGGAGA  
1801 CGTGCATGCG GTGTGATCA AGGGTCCAA CACCGGATGG CAGGCCATGT  
1851 CGCGAAACTG GGGCCAGAAT TGGCAGAGCA ATGGCTACCT CAACGGCCAG  
1901 AGCCTCTCCT TCCAGGTCAC CTCCAGCGAC GGGAAGACCG TCACCAGCTA

[cont. *EgExp4* Full Length Sequence]

1951 CAACGTCGTG CCGGCCAACT GGCAGTTCGG CCAGACCTTT GAGGGAGAAC  
2001 AATTC**TAGGC** CTCCATTGTT AgGGGGGTCT TAAGGGTTTG GGGTTTGGGA  
2051 GGATGGCCTC TCTTTGACTT TGAGAGAGGT TTGGGCCTGG TTGAATGCTG  
2101 AGGTGGCTTT ATTAGCACCC GCTGAGATGG CCTAAATAGT AGACATATTA  
2151 GACATAGATG GTCGTCTTTG TTTCTTGTTG GCAATTTAGA TTGAATGCCT  
2201 TGTGGAGATT AAGAAATCAA GGCCTTGGGT GTATAGAATT GGAATCCTCA  
2251 ACATATTATA ATATGATTGT GTGGGGGATG GTATGTCAAT TAGAGGAAAG  
2301 TATGATGTTT GCTTTGTGTA TTTCAAACAT AATATTTGTA ATCGATTGTT  
2351 CTCCAATAAT AATAAGCAAT TTATTAATTG CAGCAATGGA TTGTTCCGTT  
2401 ATTATTATAT TAtTTTTTTC TAAGGATCTT CTGACATGGA CCAGAAGCCA  
2451 TGTTTGAGGA TTCTATTTGG CCTCAGGAAA AAGATGTGGT CCTTAACCTG  
2501 ACCTGTTTGC ACAACAGGTT TGTTCAGTT TGCAACGTGT GATGGATGCT  
2551 CGGCATCACA GACTA**ACCA ATCCTGGCAA GATGAC**

\\end of sequence

**Fig. S7** The insertion and deletion variations are illustrated on the *EgExp4* reference gene sequence, which has a full-length of 2586 bp (oil palm draft sequences of Malaysian Palm Oil Board (MPOB), (<http://genomsawit.mpob.gov.my/genomsawit/>)).
